1 The circulating lipidome is largely defined by sex descriptors in the GOLDN,  
2 GeneBank and the ADNI studies

3

4 Dinesh Kumar Barupal<sup>1</sup>, Ying Zhang<sup>1,2</sup>, Sili Fan<sup>1</sup>, Stanley L. Hazen<sup>7,8</sup>, W. H. Wilson Tang  
5 <sup>7,8</sup>, Tomas Cajka<sup>6</sup>, Marguerite R. Irvin<sup>4</sup>, Donna K. Arnett<sup>3</sup>, Tobias Kind<sup>1</sup>, Rima Kaddurah-  
6 Daouk<sup>5</sup> and Oliver Fiehn<sup>1,\*</sup>

7 <sup>1</sup> West Coast Metabolomics Center, UC Davis Genome Center, University of California,  
8 Davis, 451 Health Sciences Drive, Davis, California 95616, USA

9 <sup>2</sup> Chemistry Department, University of California, Davis, California 95616, USA

10 <sup>3</sup> College of Public Health, University of Kentucky, Lexington, 121 Washington Ave,  
11 Kentucky, 40536, USA

12 <sup>4</sup> Department of Epidemiology, University of Alabama at Birmingham, 1665 University Blvd,  
13 Birmingham, Alabama, 35294, USA

14 <sup>5</sup> Department of Medicine and the Duke Institute for Brain Sciences, Duke University,  
15 Durham, NC, 27708 USA

16 <sup>6</sup> Department of Metabolomics and Department of Translational Metabolism, Institute of  
17 Physiology CAS, Prague, Czech Republic

18 <sup>7</sup> Department of Cellular & Molecular Medicine, Cleveland Clinic, Cleveland, OH 44195,  
19 USA

20 <sup>8</sup> Department of Cardiovascular Medicine, Cleveland Clinic, Cleveland, OH 44195, USA

21 **Abstract:** Biological sex is one of the major anthropometric factors which influences  
22 physiology, metabolism and health status. We have investigated the effect of sexual  
23 dimorphism on the blood lipidome profile in three large population level studies - the  
24 Alzheimer's disease neuroimaging initiative - ADNI (n =806), the GeneBank  
25 Functional Cardio-Metabolomics cohort (n= 1015) and the Genetics of Lipid lowering  
26 Drugs and Diet Network - GOLDN (n=422). In total, 355 unique lipids from 15 lipid  
27 classes were detected across all three studies using LC-MS. Sixty percent of these  
28 lipids differed between men and women in all three cohorts, and up to 87% of all  
29 lipids demonstrated sex differences in at least one cohort. ChemRICH enrichment  
30 statistics on lipid classes showed that phosphatidylcholines,

31 phosphatidylethanolamines, phosphatidylinositols, ceramides, sphingomyelins and  
32 cholesterol esters were found at higher levels in female subjects while  
33 triacylglycerols and lysophosphatidylcholines were found at higher levels in male  
34 participants across the three cohorts. This strong sex effect on the blood lipidome  
35 suggests that specific regulatory mechanisms may exist that regulate lipid  
36 metabolism in a different manner between men and women. Cohort studies involving  
37 blood lipidomics should consider separate analyses for male and female participants  
38 instead of combined analyses treating sex as a confounding factor.

39 **Keywords:** sexual dimorphism, chemical similarity, lipidomics, gender, men, women, sphingomyelin,  
40 phospholipids, triacylglycerol  
41

---

## 42 **1. Introduction**

43 Differences between the sexes are one of the fundamental variations in biology[1].  
44 Sex disparities in research can ignore discoveries of the biological mechanisms that  
45 are specific to particular sex, leading to missing opportunities in developing new sex-  
46 specific therapeutic strategies[2]. Sex differences have been observed for gut  
47 microbiota[3] and transcriptome[4], suggesting that sex-specific strategies for health  
48 improvement are needed.

49 Metabolomics has been validated for molecular epidemiology to discover risk factors  
50 and biological mechanisms for diseases. Several epidemiological studies have  
51 investigated biological sex as a main factor to define a person's metabolome.  
52 Differential network analysis of metabolomics data for 844 healthy subjects  
53 suggested a sex-related variability in branched chain amino acids, ketone bodies,

54 and propanoate metabolism [5]. Mittelstrass *et al.* argued that metabolomics analysis  
55 in epidemiology should be stratified by sex and showed a strong sex effect in 3,300  
56 participants in the Cooperative Health Research in the Region of Augsburg (KORA) cohort.  
57 The study shows that up to 78% metabolites were under sex effect, including amino  
58 acids, sphingomyelins, phosphatidylcholines and acyl-carnitines [6]. Metabolomics  
59 analysis of 1,756 participants from the KORA F4 study showed that almost 33% of  
60 the 507 metabolites were significant different between men and women. The study  
61 suggested changes in steroid metabolism, fatty acid, amino acids, purine and  
62 dipeptide metabolism differed between the sexes and suggested that a sex-  
63 regulated metabolic modules can be identified in the partial correlation network  
64 among metabolites [7]. The cross-sectional KarMeN (Karlsruhe Metabolomics and  
65 Nutrition) study included 301 participants, yielding a metabolomics dataset that  
66 predicted sex descriptors from blood specimen [8]. In a study on 60 subjects it was  
67 found that levels of sphingomyelins were higher in women in comparison to men in  
68 serum and plasma samples [9]. The study also reported that levels of triacylglycerols  
69 were higher in elderly than in younger women. Higher levels of LDL-C, HDL-C, total  
70 cholesterol, sphingomyelins and C22:6 fatty acyl-containing phospholipids were  
71 observed in women [10]. Similarly, women had higher levels of sphingomyelins and  
72 phosphatidylcholines in a French study of 800 participants. In this study, branched  
73 chain amino acids and lysophosphatidylcholines were also found to be higher in  
74 males [11]. These previous studies highlight the importance of sexual dimorphism in  
75 metabolic regulation for lipids and other metabolite levels.

76 We here report on the effect of sex descriptors on a comprehensive panel of 355  
77 blood lipids from 15 lipid classes in three large cohorts with the largest comparison  
78 to date with 2,243 subjects in total. These cohorts included the Genetics of Lipid  
79 Lowering Drugs and Diet Network (GOLDN) ( $n = 422$ ), GeneBank, Cleveland Clinic  
80 ( $n = 1,015$ ), and the Alzheimer's Disease Neuroimaging Initiative (ADNI) ( $n = 806$ ).  
81 We have used univariate statistics and chemical similarity enrichment analysis to  
82 highlight the strong sex effect on the detected lipids.

## 83 **2. Results**

### 84 **2.1 Cohort summaries and lipidomics datasets**

85 Table 1 summarizes the cohorts. Participants in the GOLDN cohort were younger  
86 compared to the ADNI and GeneBank cohorts. On average, the cohorts consisted  
87 of 60% men and 40% women.

88 Table 1 Cohort summaries

| Cohort                                                | Participants | Male      | Female | Age                |
|-------------------------------------------------------|--------------|-----------|--------|--------------------|
| Alzheimer's Disease<br>Neuroimaging Initiative (ADNI) | 806          | 481 (60%) | 358    | 75.2 ( $\pm 6.3$ ) |
| GeneBank cohort                                       | 1015         | 634 (62%) | 381    | 64 ( $\pm 10$ )    |
| Genetics of Lipid Lowering<br>Drugs and Diet Network  | 422          | 207 (49%) | 215    | 49 ( $\pm 16$ )    |

90 Figure 1 shows the lipidomics data acquisition and processing workflow. All  
91 lipidomics data were acquired using identical LC-MS instruments at the West Coast  
92 Metabolomics Center, UC Davis. A set of 15 internal standards were added to each  
93 sample which were used for retention time correction.

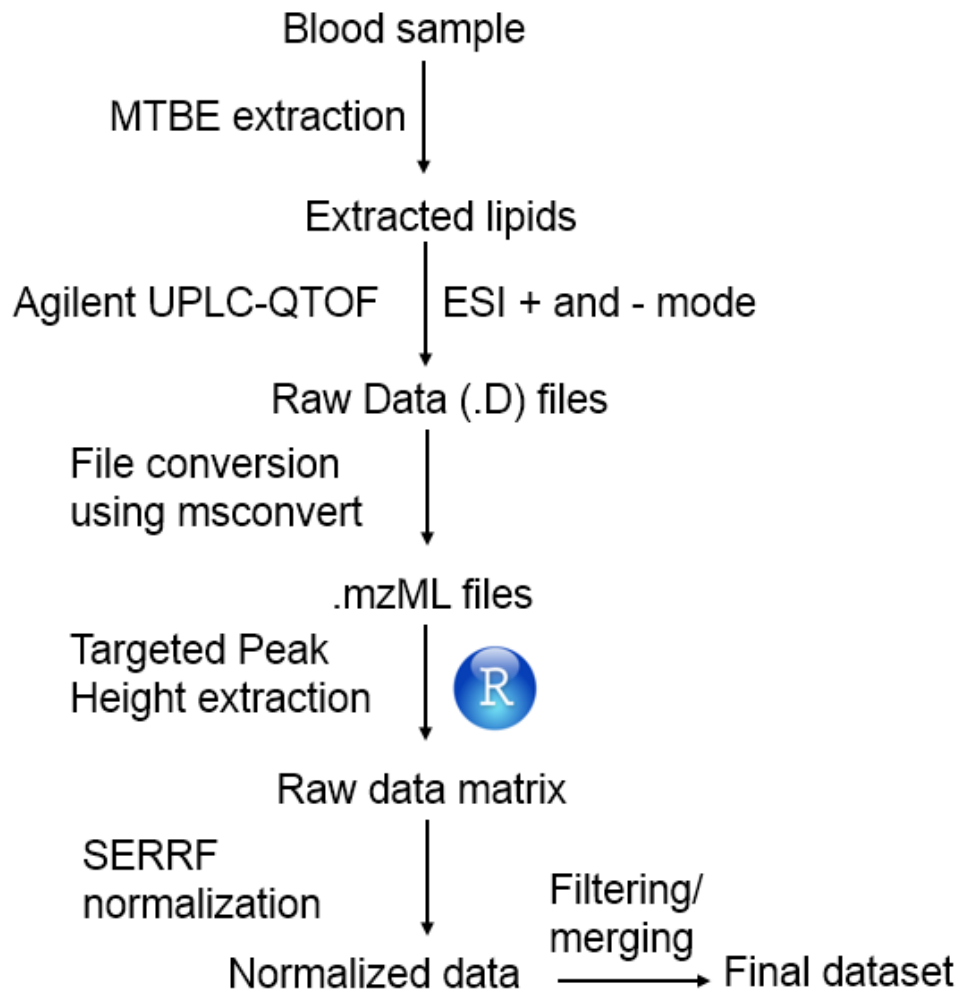

Figure 1. Data processing pipeline overview

94 A total 355 unique lipid species covering 15 lipid classes were included in the final  
95 dataset, after removing poorly detected and duplicate signals. Random forest-based  
96 normalization method using the SERRF tool[12] removed technical variance to as  
97 low as 2-6% relative standard deviation across all studies, using BioreclamationIVT

98 plasma QC samples that were analyzed after every 10<sup>th</sup> sample in all cohorts (see  
99 Supplementary Table S1).

## 100 2.2 Significantly associated individual lipids

101 Up to 87% of all lipids were found to be significantly different ( $p < 0.05$ ) between men  
102 and women in at least one cohort study using the raw  $p$ -values of the Mann-Whitney  
103 U test. More lipids were found to be specifically altered in ADNI cohort comparison  
104 to the GOLDN and GeneBank cohort studies. 33% of all significantly altered lipids  
105 were found to be common across all three studies (Figure 2).

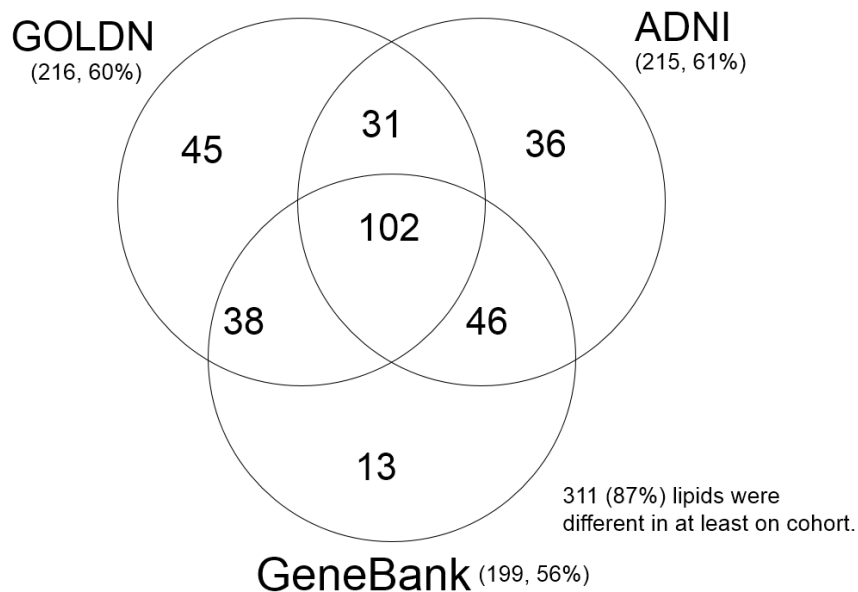

106

107 Figure 2. Overlap of significant lipids among three cohorts. 332 (94%) lipids were  
108 different in at least on cohort.

109

110 Table 2. Top 25 significant lipids between male and female in the GOLDN cohort.

111 Fatty acyl groups are annotated by the total number of carbons and the number of  
112 double bonds.

| Rank | Lipid        | <i>p</i> -value | Fold change (F/M) |
|------|--------------|-----------------|-------------------|
| 1    | SM (d32:2)   | 2E-23           | 1.4               |
| 2    | FA (13:0)    | 2E-16           | 1.6               |
| 3    | FA (16:0)    | 4E-14           | 1.5               |
| 4    | SM (d30:1)   | 4E-13           | 1.3               |
| 5    | SM (d40:3)   | 3E-12           | 1.2               |
| 6    | SM (d39:2)   | 6E-12           | 1.2               |
| 7    | PC (34:3)    | 4E-11           | 1.2               |
| 8    | LPC (20:4)   | 7E-11           | 0.8               |
| 9    | FA (12:0)    | 1E-10           | 1.3               |
| 10   | FA (10:0)    | 2E-10           | 1.4               |
| 11   | AC 18:0      | 2E-10           | 0.8               |
| 12   | SM (d41:2)   | 3E-10           | 1.1               |
| 13   | TG (54:3)    | 5E-10           | 0.7               |
| 14   | FA (18:1)    | 1E-09           | 1.5               |
| 15   | LPC (o-16:0) | 2E-09           | 0.8               |
| 16   | LPC (18:1)   | 2E-09           | 0.8               |
| 17   | TG (56:2)    | 3E-09           | 0.6               |
| 18   | LPC (17:1)   | 4E-09           | 0.8               |
| 19   | TG (62:3)    | 4E-09           | 0.7               |
| 20   | LPC (18:2)   | 4E-09           | 0.8               |
| 21   | TG (60:2)    | 6E-09           | 0.6               |
| 22   | TG (58:3)    | 9E-09           | 0.7               |
| 23   | PC (32:2)    | 1E-08           | 1.3               |
| 24   | TG (56:1)    | 1E-08           | 0.6               |
| 25   | LPC (p-16:0) | 2E-08           | 0.8               |

113

114 Table 3. Top 25 significant lipids between male and female in the ADNI cohort.

| Rank | Lipid      | <i>p</i> -value | Fold change (F/M) |
|------|------------|-----------------|-------------------|
| 1    | SM (d32:2) | 5E-52           | 1.40              |
| 2    | SM (d41:2) | 3E-38           | 1.27              |
| 3    | SM (d38:2) | 4E-37           | 1.21              |
| 4    | FA (14:1)  | 7E-37           | 1.69              |
| 5    | SM (d39:2) | 7E-33           | 1.38              |
| 6    | FA (16:1)  | 8E-33           | 1.81              |
| 7    | PE (38:6)  | 2E-31           | 1.51              |
| 8    | SM (d36:2) | 7E-26           | 1.18              |
| 9    | PC (34:3)  | 7E-26           | 1.22              |
| 10   | SM (d34:2) | 2E-25           | 1.13              |

|    |                    |       |      |
|----|--------------------|-------|------|
| 11 | SM (d30:1)         | 8E-25 | 1.30 |
| 12 | HexCer(d34:1(2OH)) | 2E-24 | 1.38 |
| 13 | PC (38:2)          | 5E-24 | 1.17 |
| 14 | LPC (18:2)         | 8E-24 | 0.80 |
| 15 | SM (d42:3)         | 1E-23 | 1.21 |
| 16 | PC (36:6)          | 4E-23 | 1.38 |
| 17 | PC (38:7)          | 5E-22 | 1.29 |
| 18 | CE (16:1)          | 1E-21 | 1.41 |
| 19 | PC (36:5) A        | 2E-21 | 1.26 |
| 20 | PC (34:4)          | 3E-21 | 1.33 |
| 21 | PC (32:2)          | 5E-21 | 1.28 |
| 22 | PE (38:4)          | 1E-20 | 1.35 |
| 23 | PC (32:1)          | 8E-20 | 1.35 |
| 24 | FA (17:1)          | 8E-19 | 1.38 |
| 25 | SM (d40:2) A       | 1E-18 | 1.17 |

115

116 Table 4. Top 25 significant lipids between male and female in the GeneBank cohort.

| Rank | Lipid        | <i>p</i> -value | Fold change (F/M) |
|------|--------------|-----------------|-------------------|
| 1    | SM (d32:2)   | 6E-54           | 1.3               |
| 2    | SM (d39:2)   | 1E-46           | 1.3               |
| 3    | SM (d36:3)   | 3E-32           | 1.4               |
| 4    | PC (36:5) A  | 5E-30           | 1.4               |
| 5    | SM (d34:2)   | 6E-28           | 1.2               |
| 6    | SM (d36:2)   | 1E-25           | 1.2               |
| 7    | SM (d30:1)   | 1E-24           | 1.3               |
| 8    | PE (38:4)    | 4E-23           | 1.3               |
| 9    | PC (34:3)    | 5E-22           | 1.2               |
| 10   | SM (d41:2)   | 2E-21           | 1.2               |
| 11   | SM (d38:2)   | 4E-19           | 1.1               |
| 12   | PC (38:6) B  | 1E-18           | 1.2               |
| 13   | PE (36:4)    | 2E-18           | 1.3               |
| 14   | SM (d37:1)   | 7E-18           | 1.2               |
| 15   | PE (38:6)    | 2E-17           | 1.3               |
| 16   | LPC (p-16:0) | 4E-17           | 0.8               |
| 17   | SM (d40:3)   | 5E-17           | 1.2               |
| 18   | PC (35:3)    | 9E-17           | 1.2               |
| 19   | PC (35:4)    | 1E-16           | 1.2               |
| 20   | PC (32:2)    | 3E-16           | 1.3               |
| 21   | PC (34:4)    | 6E-15           | 1.2               |



|    |             |       |     |
|----|-------------|-------|-----|
| 22 | PC (36:3) A | 2E-14 | 1.1 |
| 23 | PC (36:3) B | 3E-14 | 1.1 |
| 24 | PC (32:1)   | 4E-14 | 1.3 |
| 25 | SM (d42:3)  | 1E-13 | 1.2 |

117

118 Among the top-25 of the most significantly different lipids, several sphingomyelin  
119 lipids (SM) were, starting with the most significant lipid SM d32:2 were found at  
120 consistently higher levels in women than in men across all cohorts (Table 2-4). Other  
121 lipids included monounsaturated free fatty acids (FA), ceramides (Cer),  
122 triacylglycerols (TG), lysophosphatidylethanolamines (LPE) and  
123 lysophosphatidylcholines (LPC). Statistical results for all lipids are provided in the  
124 Table S1.

### 125 **2.3 Significantly associated lipid classes**

126 Next, we performed a lipid class level analysis to find which chemical classes were  
127 significantly higher in the female versus male comparison. We have utilized the  
128 ChemRICH enrichment analysis method, which does not rely on a background  
129 database for computing the set level statistics. Figure 3 shows the lipids classes  
130 associated with differences between both sexes as ChemRICH impact plots.

131 All lipid classes were found to be significantly different between men and women in  
132 at least one cohort. The most drastic effects were observed for sphingomyelins,  
133 triacylglycerol and phosphatidylcholines in the GOLDN and the GeneBank cohorts.  
134 Triacylglycerols and lysophosphatidylcholines were consistently higher in men  
135 across the three cohorts. Ceramides were higher in men in the GOLDN study but  
136 not in the ADNI cohort.

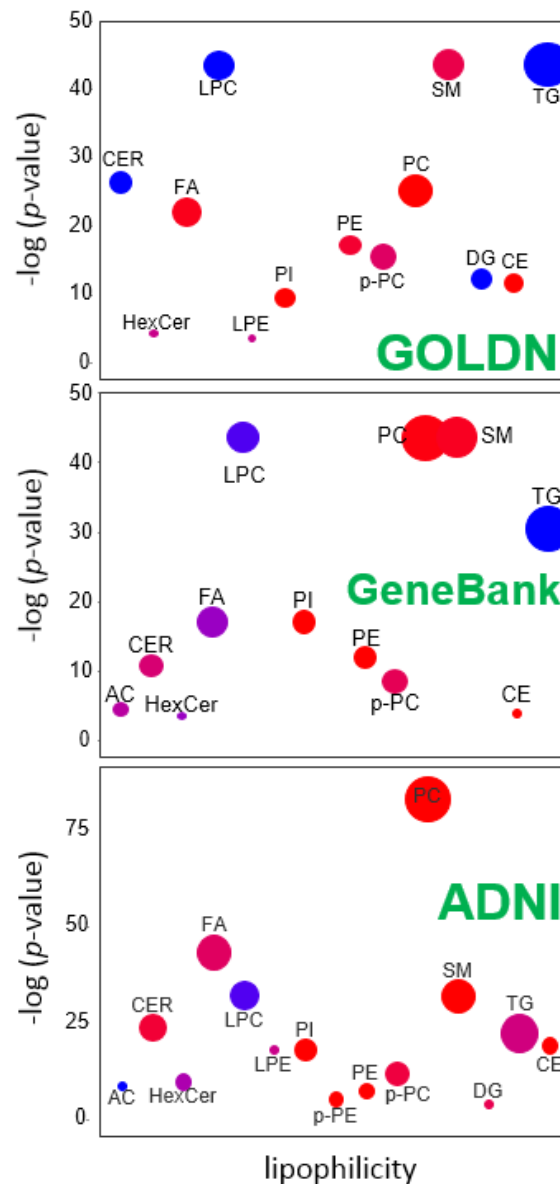

137

138 Figure 3. ChemRICH impact plots for the lipid classes associated with sex  
139 differences in three cohorts. Red dot means higher in women and blue means higher  
140 in men. Purple dot means a mixed response. Size of the dot indicates how many  
141 lipids we have in a class. Abbreviations: AC - Acylcarnitine ; CE - cholesterol ester ; CER  
142 - ceramide ; DG - diacylglycerol ; FA- fatty acid; HexCer - hexosyl ceramide ; LPC -  
143 Lysophosphatidylcholine ; LPE - Lysophosphatidylethanolamine ; PC - phosphatidylcholine  
144 ; PI – phosphatidylcholine; SM - sphingomyelin ; TG - triacylglycerol ; p-PC - plasmalogen  
145 phosphatidylcholine ; p-PE - plasmalogen phosphatidylethanolamine.

146 Acylcarnitines were higher in men in the ADNI cohort, but a mixed response was

147 observed for this lipid class in the GeneBank cohort study. Free fatty acids,

148 phosphatidylcholines, sphingomyelins, phosphatidylethanolamine,

149 phosphatidylinositols and cholesterol esters were consistently higher in women in  
150 three cohorts. It seems that age was factor for some classes – for example  
151 triacylglycerols were lower in women in the younger cohorts (GOLDN and the  
152 GeneBank cohort) but not in the ADNI cohort study that included predominately  
153 elderly subjects. Interestingly, free fatty acids showed a mixed direction as indicated  
154 by purple color in the ChemRICH plot, so we investigated the degree of saturation  
155 within this lipid class. We found that saturated fatty acids were higher in men while  
156 unsaturated fatty acids were higher in women in all three cohorts.

### 157 **3. Discussion**

158 In comparison to earlier metabolomics studies, we have expanded the sexual  
159 dimorphism analysis of blood lipidome with using a comprehensive panel and larger  
160 studies. Several new lipids classes were found to be under strong impact of sexual  
161 dimorphism. We have replicated the previous finding that levels of sphingomyelins  
162 and phosphatidylcholines were elevated in women [9,10] while  
163 lysophosphatidylcholines and acylcarnitines were found at higher concentrations in  
164 men[6,11]. We also observed differences in triacylglycerol levels in the ADNI study  
165 between women and men that could possibly be due to biological age[9], while these  
166 differences was absent in comparatively younger participants of the GOLDN and the  
167 GeneBank cohort . The most significant lipid clusters included SM, PC, TG, p-PC,  
168 LPC and FA lipids in all three cohorts. We found new sex-regulated classes including  
169 phosphatidylinositols, plasmalogens, and ceramides. Plasmalogen biosynthesis has  
170 been linked with male fertility [13]. It has been previously shown that the hepatic

171 ceramide biosynthesis is regulated by sex hormones, including testosterone [14].  
 172 Differences in lipids between both sexes may suggest that sex specific remodeling  
 173 of lipid metabolism is a fundamental biological process and calls for further studies  
 174 to discover the underlying mechanisms that can create a basis for developing sex  
 175 specific disease prevention strategies.

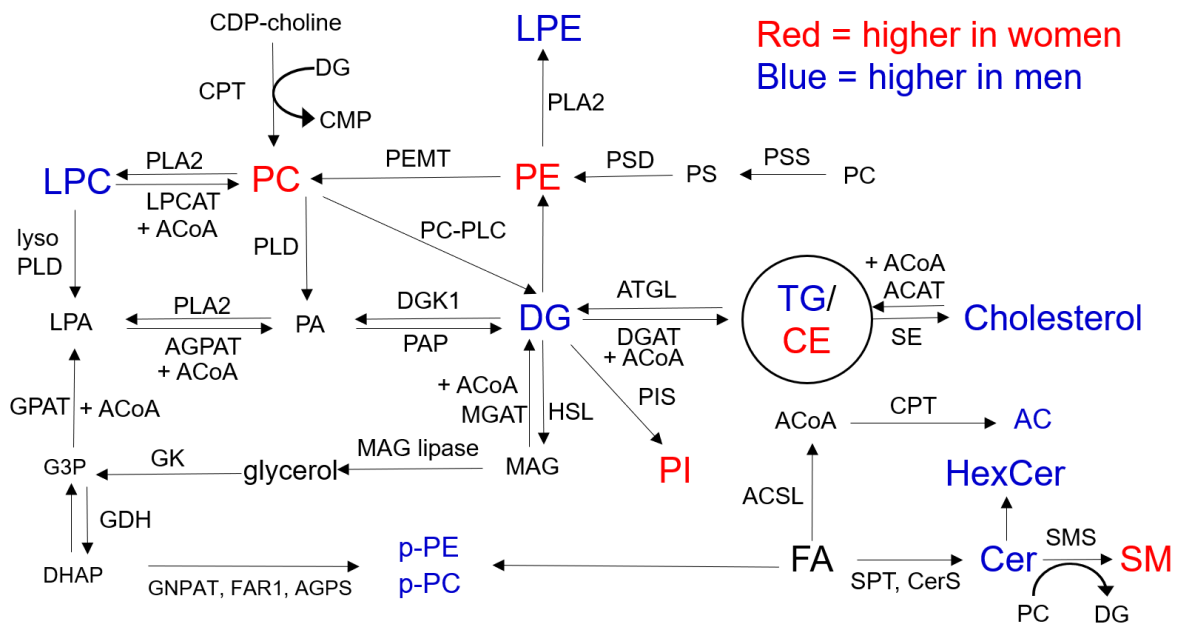

176  
 177 Figure 4. Major metabolic pathways for lipids. Blue indicates higher in male and red indicate  
 178 higher in female individuals. Abbreviations: AC - Acylcarnitine ; ACAT - Acyl-coA:cholesterol  
 179 o-acyltransferase ; ACoA - acyl coenzyme A ; AGPS - Alkylglycerone Phosphate Synthase  
 180 ; ATGL - Adipose Triglyceride Lipase ; CPT1 - Carnitine Palmitoyltransferase 1A ; CDP -  
 181 cytidine diphosphate ; CE - cholesterol ester ; CER - ceramide ; CMP - cytidine  
 182 monophosphate ; CPT - CDP-choline:1,2-diacylglycerol cholinephosphotransferase ; CerS  
 183 - ceramide synthase ; DG - diacylglycerol ; DGAT - Diacylglycerol O-Acyltransferase ; DGK1  
 184 - Diacylglycerol kinase ; DHAP - Dihydroxyacetone phosphate ; FA- fatty acid ; FAR1 - Fatty  
 185 Acyl-CoA Reductase 1 ; G3P - Glyceraldehyde 3-phosphate ; GDH - Glycerol 3-phosphate  
 186 dehydrogenase ; GK - glycerol kinase ; GNPAT - glyceronephosphate O-acyltransferase ;  
 187 GPAT - Glycerol-3-Phosphate Acyltransferase ; HSL - Hormone-sensitive Lipase ; HexCer  
 188 - hexosyl ceramide ; LPA - lysophosphatidic acid ; LPC - Lysophosphatidylcholine ; LPCAT  
 189 - Lysophosphatidylcholine acyltransferase ; LPE - Lysophosphatidylethanolamine ; MGAT -  
 190 Acyl-CoA:monoacylglycerol acyltransferase ; PA - phosphatidic acid ; PC -  
 191 phosphatidylcholine ; PC-PLC - phospholipase C ; PEMT - Phosphatidylethanolamine *N*-  
 192 Methyltransferase ; PI - phosphatidylcholine ; PIS - phosphatidylcholine synthase ; PLA2 -  
 193 phospholipase A ; PLD - phospholipase D ; PS - phosphatidylserine ; PSD -  
 194 Phosphatidylserine decarboxylase ; PSS - Phosphatidylserine synthase ; SE - sterol

195 esterase ; SM - sphingomyelin ; SMS - sphingomyelin synthase ; SPT - serine palmitoyl  
196 transferase ; TG - triacylglycerol ; p-PC - plasmalogen phosphatidylcholine ; p-PE -  
197 plasmalogen phosphatidylethanolamine  
198

199 A schema of different metabolic pathways for complex lipids is shown in Figure 4.

200 Our results show a consistently higher ratio of PC to LPC lipids in women compared

201 to men. This ratio likely indicates a higher activity of phospholipases in men to cleave

202 fatty acyl groups from PC membrane lipids to LPC lipid species. We also found

203 higher levels of PC and SM lipids in women, along with lower amounts of ceramides.

204 These three lipid classes intersect in their biochemical pathway and may directly

205 support the idea of higher sphingomyelin synthase activity in women (Figure 4).

206 Both phospholipases and sphingomyelin synthase are discussed as master

207 regulators of lipid metabolism [15-17]. These enzyme activities could be validated in

208 animal models to identify the specific organs that are contributing to the sexual

209 dimorphism of lipid differences, using functional genomics analysis to construct a

210 sex-specific metabolic network and to map regulatory mechanisms. Combining

211 metabolomics, lipidomics and genomics assays in follow-up studies should be used

212 to further discern the relative contributions from endogenous lipid remodeling versus

213 contributions from diet and exercise.

214 The strong sex effects observed in our study suggests that in epidemiological

215 studies, statistical analyses for lipidomics data should be considered separately for men

216 and women. We argue against using sex as a confounding or co-variate for

217 regression models to mask the sex-regulated biology. Instead results should be

218 interpreted separately for male and female participants. These drastic sex-regulated

219 differences in the blood lipidome have implications on large epidemiological studies  
220 to identify the lipids that can be risk factors for chronic and aging associated  
221 disorders. We have observed different patterns for men and women of utilization of  
222 saturated and unsaturated free fatty acids, but further studies are needed on  
223 remodeling of acyl chains within specific classes of complex lipid[18].

224 We have looked into three cohorts that have differences in terms of participant's age,  
225 comorbidities, diet and medication usage. Variations in these factors may affect the  
226 lipid differences that are associated with sex. One has to consider the impact of  
227 monitored, and non-monitored differences in the cohorts examined on the observed  
228 results, and additional studies and verification are required. Even though, we have  
229 observed remarkable p-values for few sphingomyelins, the sex-effect for these lipids  
230 should be checked in other epidemiological cohorts. Nonetheless, our study argue  
231 that sex specific differences should be considered in future lipidomic examinations  
232 during both study design, and analyses.

#### 233 **4. Materials and Methods**

234 **Cohort 1.** The GOLDN study (NCT00083369) focuses on how genetic factors  
235 interact with environmental (diet and drug) factors to influence triglycerides and other  
236 atherogenic lipid species and inflammation markers in blood. The study participants  
237 were primarily from three-generational pedigrees from two NHLBI Family Heart  
238 Study (FHS) field centers (Minneapolis, MN and Salt Lake City, UT). GOLDN study  
239 protocol was approved by the Institutional Review Boards at the University of  
240 Minnesota, University of Utah, Tufts University/New England Medical Center, and

241 the University of Alabama at Birmingham[19]. This study included 422 GOLDN  
242 participants who were in the extreme tertiles of the lipid response to the high fat diet  
243 intervention and had lipidomics data available. The diet intervention has been  
244 described [20].

245 **Cohort 2** . The P20 functional metabolomics of cardiovascular disease study  
246 consisted of 1,015 participants from the GeneBank cohort, a large ( $n < 10,000$ ) and  
247 well-characterized longitudinal tissue repository with associated clinical database at  
248 the Cleveland Clinic[21]. All participants gave informed consent and the study was  
249 approved by the Cleveland Clinic institutional review board.

250 **Cohort 3.** ADNI is landmark prospective study on Alzheimer's disease by National  
251 Institute of Aging. The study provides imaging, molecular, clinical and neurological  
252 function datasets for enrolled subjects along with biospecimens. In this paper,  
253 lipidomics data for the baseline serum samples from ADNI-1 study were utilized [22].  
254 The data are available at (<http://adni.loni.ucla.edu/>). Prior Institutional Review Board  
255 approval was obtained at each participating institution and written informed consent  
256 was obtained for all participants. Information about the ADNI project is provided on  
257 <http://www.adni-info.org/>.

258 **Lipid extraction:** Lipids were extracted from 20  $\mu$ L of plasma or serum samples.  
259 225  $\mu$ L cold methanol containing a mixture of 15 deuterated or odd-chain lipid  
260 internal standards was added and samples were vortexed for 10 s. After adding 750  
261  $\mu$ L of MTBE, samples were vortexed for 10 s and shaken for 5 min at 4°C. Next, 188  
262  $\mu$ L water was added and samples were vortexed for 20 s and centrifuged for 2 min

263 at 14,000x *g*. One 350  $\mu$ L aliquots from the non-polar layer was evaporated to  
264 dryness in a SpeedVac concentrator. Dried extracts were resuspended using a  
265 mixture of methanol/toluene (9:1, v/v) (60  $\mu$ L) containing an internal standard [12-  
266 [[(cyclohexylamino)carbonyl]amino]-dodecanoic acid (CUDA)] used as a quality  
267 control. Method blanks and pooled human plasma (BioreclamationIVT) were  
268 prepared along with the study samples for monitoring the data quality.

269 **LC-MS data acquisition:** Samples were analyzed using an Agilent 1290 Infinity  
270 UHPLC/6530 QTOF MS or an Agilent 1290 Infinity UHPLC/6550 QTOF MS. A  
271 charged surface hybrid (CSH) column C18 2.1 $\times$ 100 mm, 1.7  $\mu$ m column with a  
272 VanGuard CSH pre-column, C18 2.1 $\times$ 5 mm, 1.7  $\mu$ m (both Waters, Milford, MA) were  
273 used to separate the extracted lipids. A reference solution of purine and HP-0921  
274 (*m/z* 121.0509, *m/z* 922.0098 in electrospray ionization (ESI) (+) and *m/z* 119.0360  
275 and *m/z* 980.0164 (acetate adducts) in ESI(-)) was used to correct small mass drifts  
276 during the acquisition. Mobile phase A (60:40 ACN:water + 10 mM ammonium  
277 formate + 0.1% formic acid) was prepared by mixing 600 mL ACN, 400 mL water,  
278 1 mL formic acid and 630 mg of ammonium formate. Mobile phase B solvent (90:10  
279 IPA:ACN + 10 mM ammonium formate + 0.1% formic acid) was prepared by mixing  
280 900 mL IPA, 100 mL acetonitrile, 1 mL formic acid, 630 mg ammonium formate  
281 previously dissolved in 1 mL of H<sub>2</sub>O. Both solvents were mixed and sonicated for  
282 10 min (twice) before their use. For ESI (-) the composition of mobile phases was  
283 identical but 10 mM ammonium acetate (771 mg per 1 L) was used instead as  
284 modifier for the ADNI and GOLDN cohort samples. The quadrupole/time-of-flight



285 (QTOF) mass spectrometers were operated with electrospray ionization (ESI)  
286 performing full scan in the mass range  $m/z$  100–1700 in positive and negative  
287 modes. Instrument parameters were as follows for the ESI ( + ) mode on the Agilent  
288 6530 QTOF – gas temperature 325 °C, gas flow 8L/min, nebulizer 35 psig, sheath  
289 gas temperature 350 °C, sheath gas flow 11, capillary voltage 3500 V, nozzle voltage  
290 1000 V, and fragmentor voltage 120 V. In negative ion mode (Agilent 6550 QTOF),  
291 gas temperature 200°C, gas flow 14L/min, fragmentor 175 V, with the other  
292 parameters identical to positive ion mode. Data were collected in centroid mode at a  
293 rate of 2 scans/s. Injection volume was 1.7  $\mu$ L for the positive mode and 5  $\mu$ L for the  
294 negative mode. The liquid chromatography gradient used a 0.6 mL/min linear  
295 velocity flow rate. The gradient started at 15% B, ramped to 30% at 2 min, 48% at  
296 2.5 min, 82% at 11 min, 99% at 11.5 min and kept at 99% B until 12 min before  
297 ramping down to 15% B at 12.1 min which was kept isocratic until 15 min to  
298 equilibrate the column. The total run time was 15 min. Samples were analyzed in in  
299 multiple batches with batch size ranging from 200-300 samples. After every ten  
300 cohort samples, one BioreclamationIVT pooled plasma QC sample was analyzed.

301 **Targeted signal extraction and data generation:** Raw LC-MS data files were  
302 converted to the mzML format using the Proteowizard MS Convert utility. These files  
303 were imported in R using the mzR package. A database of validated lipids that were  
304 routinely detected in blood samples has been compiled at the West Coast  
305 Metabolomics Center over the past seven years. In this database, annotated lipids  
306 are associated with retention time, adducts,  $m/z$  value and InChI keys, verified by

307 accurate mass, isotope ratio, retention time and MS/MS spectra matching to either  
308 commercial lipid standards or to the LipidBlast library[23]. In the database, ESI  
309 positive mode had 515 RT-*m/z* values and ESI negative mode had 457 RT-  
310 *m/z* values [22]. Using the retention time–mass-to-charge ratio, RT-*m/z* database as  
311 a targeted list, we extracted the ion chromatograms (EICs) for all *m/z* values using  
312 R software with a targeted signal extraction strategy, stretching a range of  $\pm 0.5$  min  
313 of the target retention time for each *m/z* value and to obtain the peak height values  
314 for all lipids. No peak smoothing or integration method was applied to the EICs. To  
315 address retention time drifts between cohorts and among all samples of each cohort  
316 study, retention times of the internal standards were obtained for each sample using  
317 a  $\pm 0.2$  min retention time window to find the peak apexes of the internal standards.  
318 A polynomial regression of second order (quadratic) curve was fitted between the  
319 expected and observed retention times of the internal standards. The retention times  
320 of the remaining compounds in the target database were recalibrated using the  
321 regression model. The updated retention times were used with a window of 0.15 min  
322 for each metabolite to extract the *m/z* intensities values belonging to that ion.  
323 Maximum intensity values within the retention time window were used as the peak  
324 height of the target compounds. Data were normalized using quality control pool  
325 samples that were interjected between every 10 subject samples during data  
326 acquisition. We employed the SERRF random forest machine learning algorithm [12]  
327 to remove batch and drift effects in each cohort data set for each individual lipid.

328 **Statistical analysis:** Data were log transformed before statistical testing. The Mann-  
329 Whitney-U test was used to find raw significance values for each lipid between men  
330 and women in each of the three cohorts. *p*-values from the Mann-Whitney-U test  
331 were used as input for the chemical similarity enrichment analysis using the  
332 ChemRICH software[24] to find statistical significance levels on the basis of lipid  
333 classes. ChemRICH *p*-values were corrected for the false discovery rate.

## 334 **5. Conclusions**

335 Our study is the largest lipidomics study to report differences between male and  
336 female participants. We have acquired LC-MS datasets on identical mass  
337 spectrometers and have used machine learning methods-based signal correction  
338 approach to remove technical variance and batch effects. Use of a database  
339 independent lipid set enrichment analysis methods have identified a number of  
340 specific lipid classes that were associated with differences between adult men and  
341 women. Epidemiological studies focusing on these drastically different lipid classes  
342 need to stratify the cohort data and interpret the results separately for male and  
343 female participants.

344 **Supplementary Materials:** The following are available online at [www.mdpi.com/xxx/s1](http://www.mdpi.com/xxx/s1),  
345 Table S1: Measured lipids and their statistical significance across three cohorts.

346 **Author Contributions:** D.K.B and O.F. designed the analysis. D.K.B. Y.Z. S.F processed  
347 LC/MS data and performed statistical analysis. S.L.H., W.H.W.T., M.R.I., D.K.A and R.K.D.  
348 provided blood samples. O.F., T.C. and T.K. acquired lipidomics data. All author contributed  
349 in the manuscript writing and approved the content.

350 **Funding:** This work was funded through NIH award U54AI138370, U19AG023122 and U2C  
351 ES030158 (OF). The GeneBank study was partially supported by NIH grants DK106000,  
352 HL103866, HL076491, HL128300 and HL126827. S.L.H. reports also being supported in  
353 part by a Leducq Foundation award, and the Leonard Krieger endowment for Preventive  
354 Cardiology. The GOLDN study was supported by NIH R01 HL091357, NIH R01 HL104135,

355 NIH U01 HL072524 and American Heart Association grant 15SDG25760020. The ADNI  
356 study was funded through NIH awards U54AI138370 and U19AG023122. National Institute  
357 on Aging (R01AG046171, RF1AG051550, and RF1AG057452 and 3U01AG024904-09S4)  
358 supported the Alzheimer Disease Metabolomics Consortium which is a part of NIA national  
359 initiatives AMP-AD and M2OVE AD. Data collection and sharing for this project was funded  
360 by the Alzheimer's Disease Neuroimaging Initiative (ADNI) (National Institutes of Health  
361 Grant U01 AG024904) and DOD ADNI (Department of Defense award number W81XWH-12-2-  
362 0012).

363 **Conflicts of Interest:** Dr. Hazen reports being named as co-inventor on pending and issued  
364 patents held by the Cleveland Clinic relating to cardiovascular diagnostics or therapeutics,  
365 and having the right to receive royalty payment for inventions or discoveries related to  
366 cardiovascular diagnostics or therapeutics. Dr. Hazen also reports having been paid as a  
367 consultant for P&G, and receiving research funds from Astra Zeneca, P&G, Pfizer Inc., and  
368 Roche Diagnostics.

## 369 References

- 370 1. Snell, D.M.; Turner, J.M.A. Sex Chromosome Effects on Male-Female Differences in Mammals.  
371 *Current biology : CB* **2018**, *28*, R1313-R1324, doi:10.1016/j.cub.2018.09.018.
- 372 2. Carrero, J.J.; Hecking, M.; Chesnaye, N.C.; Jager, K.J. Sex and gender disparities in the  
373 epidemiology and outcomes of chronic kidney disease. *Nature reviews. Nephrology* **2018**, *14*, 151-  
374 164, doi:10.1038/nrneph.2017.181.
- 375 3. Markle, J.G.; Frank, D.N.; Mortin-Toth, S.; Robertson, C.E.; Feazel, L.M.; Rolle-Kampczyk, U.;  
376 von Bergen, M.; McCoy, K.D.; Macpherson, A.J.; Danska, J.S. Sex differences in the gut microbiome  
377 drive hormone-dependent regulation of autoimmunity. *Science* **2013**, *339*, 1084-1088,  
378 doi:10.1126/science.1233521.
- 379 4. Yuan, Y.; Liu, L.; Chen, H.; Wang, Y.; Xu, Y.; Mao, H.; Li, J.; Mills, G.B.; Shu, Y.; Li, L., et al.  
380 Comprehensive Characterization of Molecular Differences in Cancer between Male and Female  
381 Patients. *Cancer cell* **2016**, *29*, 711-722, doi:10.1016/j.ccell.2016.04.001.
- 382 5. Vignoli, A.; Tenori, L.; Luchinat, C.; Saccenti, E. Age and Sex Effects on Plasma Metabolite  
383 Association Networks in Healthy Subjects. *Journal of proteome research* **2018**, *17*, 97-107,  
384 doi:10.1021/acs.jproteome.7b00404.
- 385 6. Mittelstrass, K.; Ried, J.S.; Yu, Z.; Krumsiek, J.; Gieger, C.; Prehn, C.; Roemisch-Margl, W.;  
386 Polonikov, A.; Peters, A.; Theis, F.J., et al. Discovery of sexual dimorphisms in metabolic and genetic  
387 biomarkers. *PLoS genetics* **2011**, *7*, e1002215, doi:10.1371/journal.pgen.1002215.
- 388 7. Krumsiek, J.; Mittelstrass, K.; Do, K.T.; Stuckler, F.; Ried, J.; Adamski, J.; Peters, A.; Illig, T.;  
389 Kronenberg, F.; Friedrich, N., et al. Gender-specific pathway differences in the human serum  
390 metabolome. *Metabolomics : Official journal of the Metabolomic Society* **2015**, *11*, 1815-1833,  
391 doi:10.1007/s11306-015-0829-0.
- 392 8. Rist, M.J.; Roth, A.; Frommherz, L.; Weinert, C.H.; Kruger, R.; Merz, B.; Bunzel, D.; Mack, C.;  
393 Egert, B.; Bub, A., et al. Metabolite patterns predicting sex and age in participants of the Karlsruhe  
394 Metabolomics and Nutrition (KarMeN) study. *PLoS one* **2017**, *12*, e0183228,  
395 doi:10.1371/journal.pone.0183228.
- 396 9. Ishikawa, M.; Maekawa, K.; Saito, K.; Senoo, Y.; Urata, M.; Murayama, M.; Tajima, Y.; Kumagai,  
397 Y.; Saito, Y. Plasma and serum lipidomics of healthy white adults shows characteristic profiles by  
398 subjects' gender and age. *PLoS one* **2014**, *9*, e91806, doi:10.1371/journal.pone.0091806.
- 399 10. Wong, M.W.K.; Braid, N.; Pickford, R.; Vafaee, F.; Crawford, J.; Muenchhoff, J.; Schofield, P.;  
400 Attia, J.; Brodaty, H.; Sachdev, P., et al. Plasma lipidome variation during the second half of the  
401 human lifespan is associated with age and sex but minimally with BMI. *PLoS one* **2019**, *14*, e0214141,  
402 doi:10.1371/journal.pone.0214141.
- 403 11. Trabado, S.; Al-Salameh, A.; Croixmarie, V.; Masson, P.; Corruble, E.; Feve, B.; Colle, R.; Ripoll,  
404 L.; Walther, B.; Boursier-Neyret, C., et al. The human plasma-metabolome: Reference values in 800  
405 French healthy volunteers; impact of cholesterol, gender and age. *PLoS one* **2017**, *12*, e0173615,  
406 doi:10.1371/journal.pone.0173615.

- 407 12. Fan, S.; Kind, T.; Cajka, T.; Hazen, S.L.; Tang, W.H.W.; Kaddurah-Daouk, R.; Irvin, M.R.; Arnett,  
408 D.K.; Barupal, D.K.; Fiehn, O. Systematic Error Removal Using Random Forest for Normalizing  
409 Large-Scale Untargeted Lipidomics Data. *Analytical chemistry* **2019**, *91*, 3590-3596,  
410 doi:10.1021/acs.analchem.8b05592.
- 411 13. Rodemer, C.; Thai, T.P.; Brugger, B.; Kaercher, T.; Werner, H.; Nave, K.A.; Wieland, F.; Gorgas,  
412 K.; Just, W.W. Inactivation of ether lipid biosynthesis causes male infertility, defects in eye  
413 development and optic nerve hypoplasia in mice. *Hum Mol Genet* **2003**, *12*, 1881-1895.
- 414 14. Norheim, F.; Bjellaas, T.; Hui, S.T.; Chella Krishnan, K.; Lee, J.; Gupta, S.; Pan, C.; Hasin-  
415 Brumshtein, Y.; Parks, B.W.; Li, D.Y., et al. Genetic, dietary, and sex-specific regulation of hepatic  
416 ceramides and the relationship between hepatic ceramides and IR. *Journal of lipid research* **2018**,  
417 *59*, 1164-1174, doi:10.1194/jlr.M081398.
- 418 15. Villani, M.; Subathra, M.; Im, Y.B.; Choi, Y.; Signorelli, P.; Del Poeta, M.; Luberto, C.  
419 Sphingomyelin synthases regulate production of diacylglycerol at the Golgi. *Biochem J* **2008**, *414*,  
420 31-41, doi:10.1042/BJ20071240.
- 421 16. Kuwata, H.; Yamamoto, S.; Miyazaki, Y.; Shimbara, S.; Nakatani, Y.; Suzuki, H.; Ueda, N.;  
422 Yamamoto, S.; Murakami, M.; Kudo, I. Studies on a mechanism by which cytosolic phospholipase A2  
423 regulates the expression and function of type IIA secretory phospholipase A2. *J Immunol* **2000**, *165*,  
424 4024-4031.
- 425 17. Choukroun, G.J.; Marshansky, V.; Gustafson, C.E.; McKee, M.; Hajjar, R.J.; Rosenzweig, A.;  
426 Brown, D.; Bonventre, J.V. Cytosolic phospholipase A(2) regulates golgi structure and modulates  
427 intracellular trafficking of membrane proteins. *J Clin Invest* **2000**, *106*, 983-993, doi:10.1172/JCI8914.
- 428 18. Wathes, D.C.; Abayasekara, D.R.; Aitken, R.J. Polyunsaturated fatty acids in male and female  
429 reproduction. *Biol Reprod* **2007**, *77*, 190-201, doi:10.1095/biolreprod.107.060558.
- 430 19. Irvin, M.R.; Zhi, D.; Joehanes, R.; Mendelson, M.; Aslibekyan, S.; Claas, S.A.; Thibeault, K.S.;  
431 Patel, N.; Day, K.; Jones, L.W., et al. Epigenome-wide association study of fasting blood lipids in the  
432 Genetics of Lipid-lowering Drugs and Diet Network study. *Circulation* **2014**, *130*, 565-572,  
433 doi:10.1161/CIRCULATIONAHA.114.009158.
- 434 20. Geng, X.; Irvin, M.R.; Hidalgo, B.; Aslibekyan, S.; Srinivasasainagendra, V.; An, P.; Frazier-  
435 Wood, A.C.; Tiwari, H.K.; Dave, T.; Ryan, K., et al. An exome-wide sequencing study of lipid response  
436 to high-fat meal and fenofibrate in Caucasians from the GOLDN cohort. *J Lipid Res* **2018**, *59*, 722-  
437 729, doi:10.1194/jlr.P080333.
- 438 21. Li, X.S.; Wang, Z.; Cajka, T.; Buffa, J.A.; Nemet, I.; Hurd, A.G.; Gu, X.; Skye, S.M.; Roberts,  
439 A.B.; Wu, Y., et al. Untargeted metabolomics identifies trimethyllysine, a TMAO-producing nutrient  
440 precursor, as a predictor of incident cardiovascular disease risk. *JCI insight* **2018**, *3*,  
441 doi:10.1172/jci.insight.99096.
- 442 22. Barupal, D.K.; Fan, S.; Wancewicz, B.; Cajka, T.; Sa, M.; Showalter, M.R.; Baillie, R.;  
443 Tenenbaum, J.D.; Louie, G.; Alzheimer's Disease Neuroimaging, I., et al. Generation and quality  
444 control of lipidomics data for the alzheimer's disease neuroimaging initiative cohort. *Scientific data*  
445 **2018**, *5*, 180263, doi:10.1038/sdata.2018.263.
- 446 23. Kind, T.; Liu, K.H.; Lee, D.Y.; DeFelice, B.; Meissen, J.K.; Fiehn, O. LipidBlast in silico tandem  
447 mass spectrometry database for lipid identification. *Nat Methods* **2013**, *10*, 755-758,  
448 doi:10.1038/nmeth.2551.
- 449 24. Barupal, D.K.; Fiehn, O. Chemical Similarity Enrichment Analysis (ChemRICH) as alternative to  
450 biochemical pathway mapping for metabolomic datasets. *Scientific reports* **2017**, *7*, 14567,  
451 doi:10.1038/s41598-017-15231-w.
